# Supplementary material for: Mucin coated protein-polyphenol microcarriers for daidzein delivery
Source: Royal Society of Chemistry journal article supplement (doi:10.1039/d3fo03356b), 2024-01-01
Supplement: d3fo03356b1.pdf [file d3fo03356b1.pdf]

Electronic Supplementary Material (ESI) for Food & Function.

**Table S1. MS conditions and optimized MRM transitions and compound-dependent parameters for UPLC-MS/MS analysis of daidzein and their respective internal standards.**

| <b>MS Conditions</b>                      |                                  |
|-------------------------------------------|----------------------------------|
| <b>Ion mode</b>                           | <b>H-ESI positive ionization</b> |
| <b>Ion transfer tube temperature (°C)</b> | <b>325</b>                       |
| <b>Vaporiser temperature (°C)</b>         | <b>350</b>                       |
| <b>Capillary voltage (V)</b>              | <b>4363.64</b>                   |
| <b>Dwell time (ms)</b>                    | <b>50</b>                        |

| <b>MRM Parameters</b> |                             |                         |                      |                          |                             |                    |
|-----------------------|-----------------------------|-------------------------|----------------------|--------------------------|-----------------------------|--------------------|
| <b>Compound</b>       | <b>Retention time (min)</b> | <b>Parent ion (m/z)</b> | <b>Compound type</b> | <b>Product ion (m/z)</b> | <b>Collision energy (V)</b> | <b>Rf lens (V)</b> |
| <b>Daidzein</b>       | <b>1.75</b>                 | <b>255</b>              | <b>Confirming</b>    | <b>137.012</b>           | <b>26.31</b>                | <b>119</b>         |
|                       |                             |                         | <b>Confirming</b>    | <b>152.167</b>           | <b>43.92</b>                | <b>119</b>         |
|                       |                             |                         | <b>Confirming</b>    | <b>181.024</b>           | <b>31.16</b>                | <b>119</b>         |
|                       |                             |                         | <b>Target</b>        | <b>198.982</b>           | <b>24</b>                   | <b>119</b>         |
| <b>Daidzein-D3</b>    | <b>1.74</b>                 | <b>257.9</b>            | <b>Confirming</b>    | <b>138</b>               | <b>27.7</b>                 | <b>175</b>         |
|                       |                             |                         | <b>Confirming</b>    | <b>184.042</b>           | <b>31.24</b>                | <b>175</b>         |
|                       |                             |                         | <b>Confirming</b>    | <b>155.054</b>           | <b>40.43</b>                | <b>175</b>         |
|                       |                             |                         | <b>Target</b>        | <b>138</b>               | <b>27.7</b>                 | <b>175</b>         |

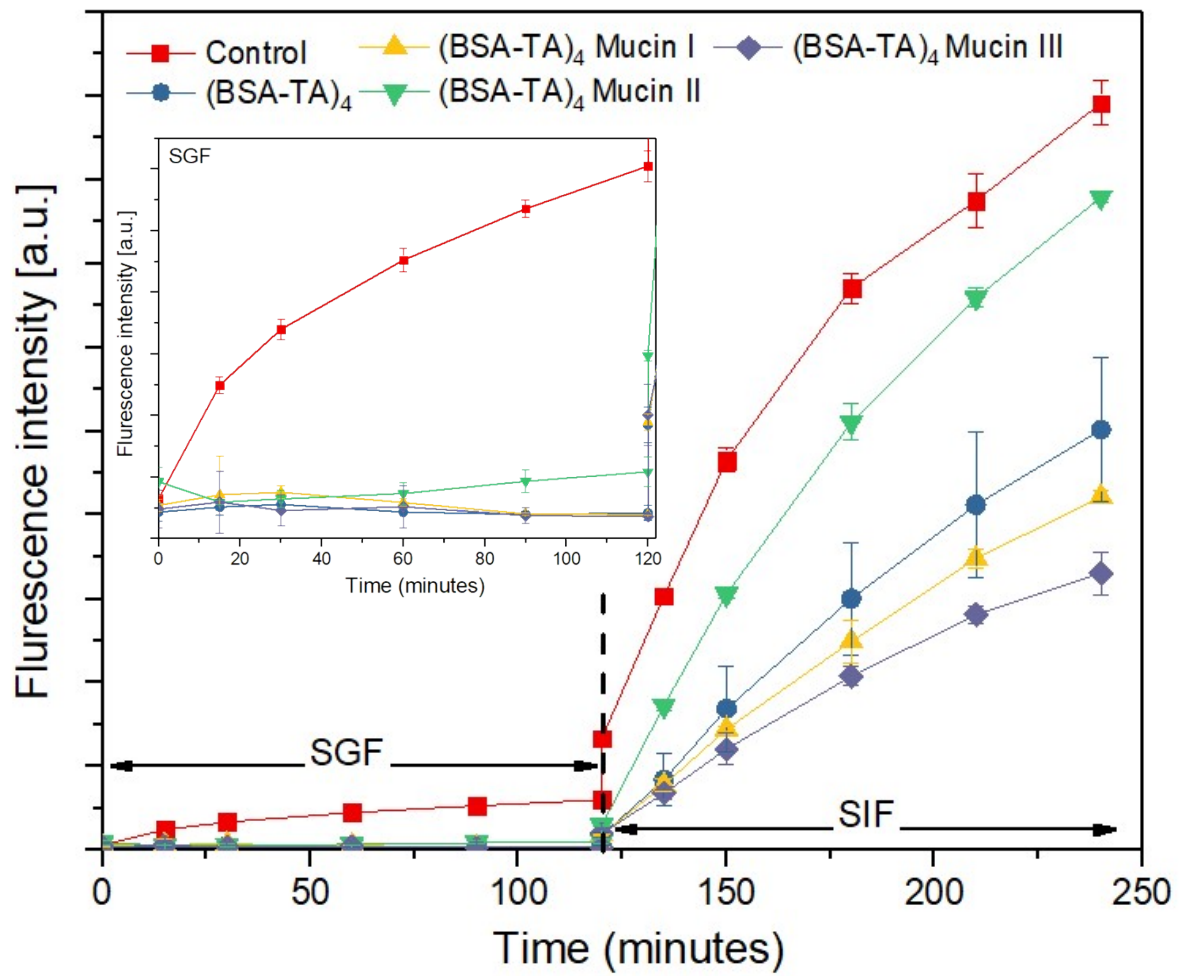

**Figure S1.** Fluorescence intensities with respect to digestion time in SGF followed by SIF of control free DQ™ Red BSA solution, DQ™ Red BSA encapsulated in (BSA-TA)<sub>4</sub> and (BSA-TA)<sub>4</sub> in Mucin Type I, II and III shells. Inset shows enlarge graph in SGF.

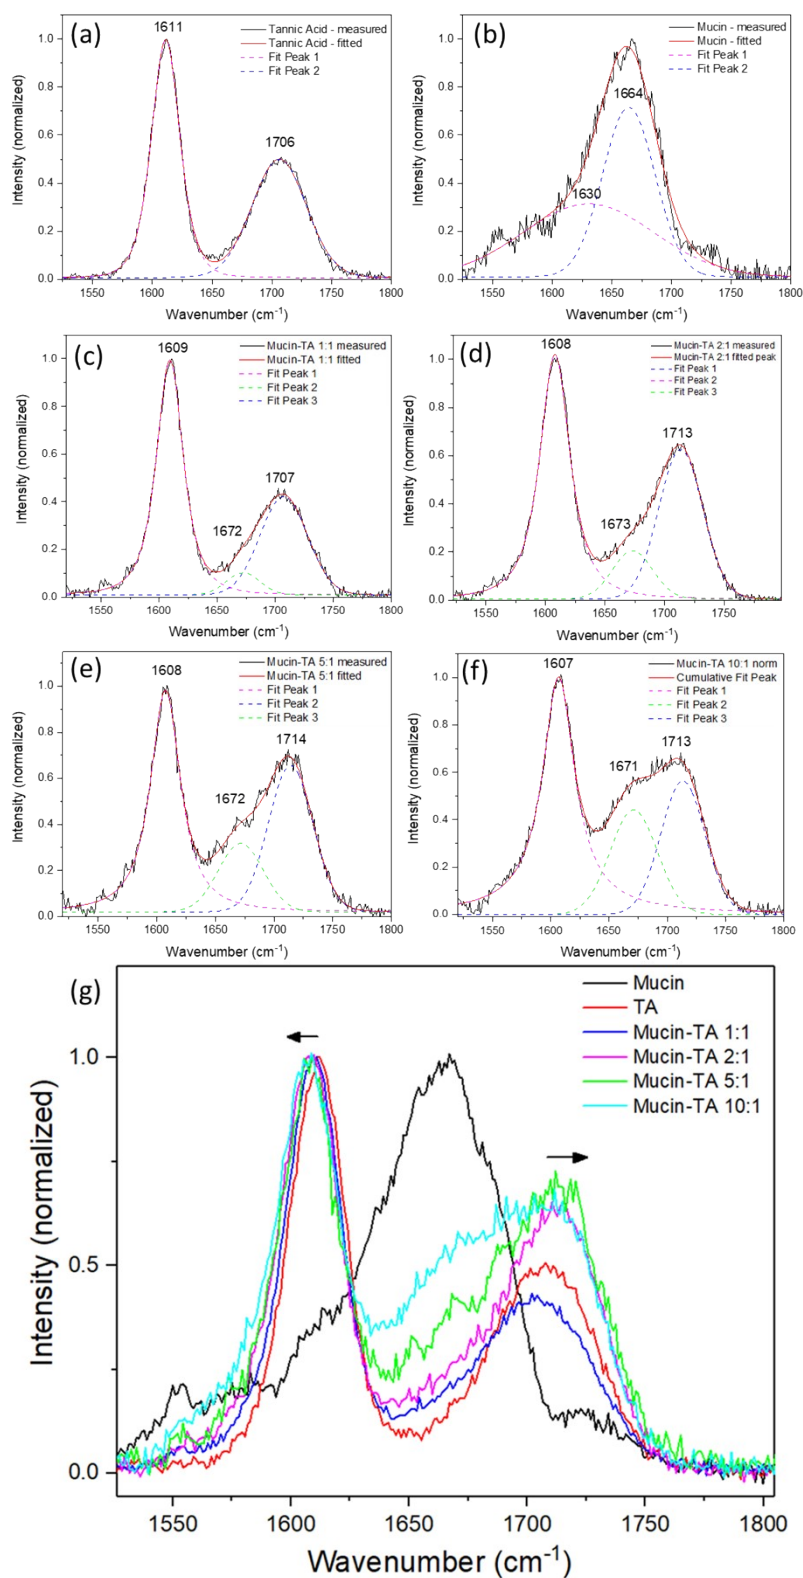

**Figure S2.** Raman peaks of (a) TA, (b) mucin, and mucin-TA complex at ratio (c) 1:1, (d) 2:1; (e) 5:1, (f) 10:1 and (g) Raman spectra.

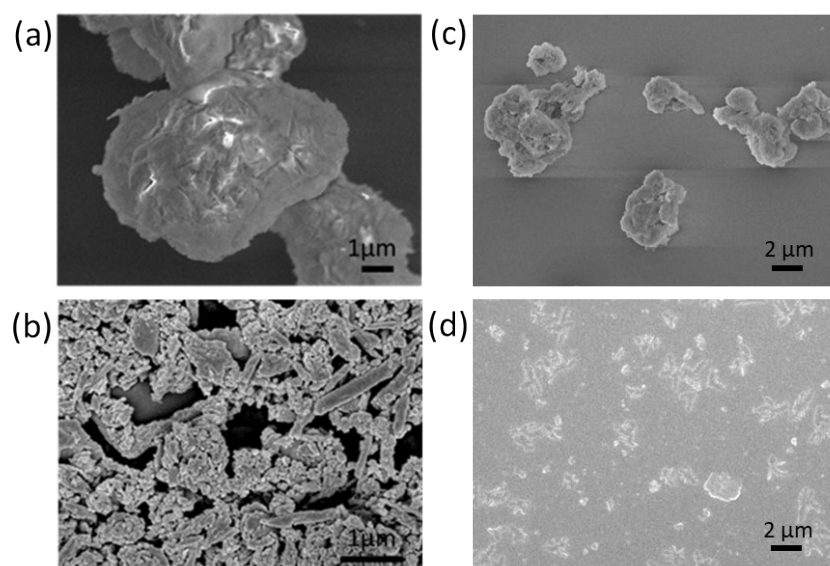

**Figure S3.** SEM of daidzein loaded FCC microparticles (a) before and (b) after ball milling and daidzein loaded (BSA-TA)<sub>4</sub>-mucin microcarriers (c) before and (d) after ball milling.

**Table S2.** S-Equol measured of unprotected daidzein in colonic set-ups with donor fecal microbiota and *Slackia equolifaciens* by UPLC-MS.

| Timepoints | Colonic System         | Presence of S-Equol | Concentration of S-Equol (mM) |
|------------|------------------------|---------------------|-------------------------------|
| 120h       | <i>Slackia</i>         | No                  | NA                            |
| 120h       | <i>Slackia</i> + Donor | Yes                 | 0.058                         |
